# Supplementary material for: The importance of naming cryptic species and the conservation of endemic subterranean amphipods
Source: PubMed Central journal article supplement (PMC5469755; doi:10.1038/s41598-017-02938-z), 2017-06-13
Supplement: 41598_2017_2938_MOESM1_ESM.pdf [file 41598_2017_2938_MOESM1_ESM.pdf]

# The importance of naming cryptic species and the conservation of endemic subterranean amphipods

## Supplementary Information

Teo Delić, Peter Trontelj, Michal Rendoš, Cene Fišer

### Contents

*Supplementary Information 1.* List of samples

*Supplementary Information 2.* Details on molecular analyses [supplementary information to Materials and Methods and Results, including Tables S2-S4, and Figure S1]

*Supplementary Information 3.* Morphological diagnosis of the complex, cryptic nature of the complex, etymology and holotype information. [including Table S5]

References

**Supplementary Material 1.** List of samples

Table S1. List of samples, localities and GenBank accession numbers

| Species name               | Voucher | Locality                                          | Coordinates (wgs84) |          |          | Markers used |          |          |  |
|----------------------------|---------|---------------------------------------------------|---------------------|----------|----------|--------------|----------|----------|--|
|                            |         |                                                   | longitude           | latitude | 28S      | H3           | COI      | ITS      |  |
| <i>N. aberrans</i>         | NA025   | Ljublanica freatik, Sneberje, Ljubljana           | 14.57311            | 46.08042 | EF617260 | NA           | NA       | NA       |  |
| <i>N. aitulosi</i>         | NA081   | Lisimachia, Klisorevmata, Agrinio                 | 21.36557            | 38.55653 | EU693310 | KP133142     | NA       | NA       |  |
| <i>N. arbiter</i>          | NA050   | Izvir v luki, Vrbnik, Krk                         | 14.67818            | 45.07839 | EF617286 | KR905885     | NA       | NA       |  |
| <i>N. arbiter</i>          | NA052   | Tounjčica špilja, Tounj, Ogulin                   | 15.32240            | 45.24871 | EF617287 | JQ815482     | KR905787 | KR905834 |  |
| <i>N. brachytelson</i>     | NA071   | Lukova jama pri Zdihovem, Suhor, Kočevje          | 14.89410            | 45.52580 | EU693293 | JQ815489     | KR905797 | NA       |  |
| <i>N. brixianus</i>        | NC022   | Grotta sotto la Cornabusa, Valpiana, Valle Imagna | 9.53024             | 45.79816 | KX379005 | KX379050     | KX379113 | NA       |  |
| <i>N. carniolicus</i>      | NA017   | Jama pod gradom Luknja, Prečna, Novo mesto        | 15.09978            | 45.81841 | EF617252 | JQ815525     | KR905776 | NA       |  |
| <i>N. caspary</i>          | NA073   | Tuebingen, Tuebingen                              | 9.05910             | 48.52136 | EU693291 | KJ566712     | NA       | NA       |  |
| <i>N. chagankae</i> sp. n. | NA523   | Jama v Kamnolomu, Vinica, Črnomelj                | 15.24431            | 45.45443 | JQ815441 | JQ815498     | KR905828 | KY617742 |  |
| <i>N. chagankae</i> sp. n. | NB626   | Dakina jama, Sekulići, Ozalj                      | 15.30719            | 45.73133 | NA       | KY617577     | NA       | NA       |  |
| <i>N. chagankae</i> sp. n. | NB792   | Čaganka, Miklarji, Črnomelj                       | 15.08215            | 45.54989 | KY617397 | KY617585     | KY617497 | KY617687 |  |
| <i>N. chagankae</i> sp. n. | NB793   | Čaganka, Miklarji, Črnomelj                       | 15.08215            | 45.54989 | KY617398 | KY617586     | KY617498 | KY617688 |  |
| <i>N. chagankae</i> sp. n. | NB794   | Čaganka, Miklarji, Črnomelj                       | 15.08215            | 45.54989 | KY617399 | KY617587     | KY617499 | KY617689 |  |
| <i>N. chagankae</i> sp. n. | NB801   | Zagorska peć, Zagorje, Ogulin                     | 15.21990            | 45.19685 | KY617406 | KY617594     | KY617506 | KY617696 |  |
| <i>N. chagankae</i> sp. n. | NB802   | Zagorska peć, Zagorje, Ogulin                     | 15.21990            | 45.19685 | KY617407 | KY617595     | KY617507 | NA       |  |
| <i>N. chagankae</i> sp. n. | NB803   | Zagorska peć, Zagorje, Ogulin                     | 15.21990            | 45.19685 | KY617408 | KY617596     | KY617508 | KY617697 |  |
| <i>N. chagankae</i> sp. n. | NB804   | Špilja pod Kovačevcem, Bandino selo, Blagaj       | 15.57886            | 45.21826 | KY617409 | KY617597     | KY617509 | NA       |  |
| <i>N. chagankae</i> sp. n. | NB805   | Špilja pod Kovačevcem, Bandino selo, Blagaj       | 15.57886            | 45.21826 | KY617410 | KY617598     | KY617510 | NA       |  |
| <i>N. chagankae</i> sp. n. | NB855   | Kuštrovka, Ponikve, Ogulin                        | 15.21992            | 45.34588 | KY617419 | KY617603     | KY617519 | KY617704 |  |
| <i>N. chagankae</i> sp. n. | NB856   | Kuštrovka, Ponikve, Ogulin                        | 15.21992            | 45.34588 | KY617420 | KY617604     | KY617520 | KY617705 |  |

|                            |       |                                             |          |          |          |          |          |          |
|----------------------------|-------|---------------------------------------------|----------|----------|----------|----------|----------|----------|
| <i>N. chagankae</i> sp. n. | NB860 | Dolača, Drašći vrh, Žumberak                | 15.47821 | 45.74012 | KY617424 | KY617608 | NA       | NA       |
| <i>N. chagankae</i> sp. n. | NB861 | Dolača, Drašći vrh, Žumberak                | 15.47821 | 45.74012 | KY617425 | KY617609 | NA       | NA       |
| <i>N. chagankae</i> sp. n. | NB862 | Dolača, Drašći vrh, Žumberak                | 15.47821 | 45.74012 | KY617426 | KY617610 | NA       | NA       |
| <i>N. chagankae</i> sp. n. | NB931 | Vodena jama, Kolići, Generalski stol        | 15.32199 | 45.34069 | KY617446 | KY617630 | NA       | KY617723 |
| <i>N. chagankae</i> sp. n. | NC086 | Dakina jama, Sekulići, Ozalj                | 15.30719 | 45.73133 | KY617454 | KY617639 | NA       | NA       |
| <i>N. costozzae</i>        | NA074 | Covolo della Guerra, Longare, Vicenza       | 11.60000 | 45.48333 | EU693294 | KJ566713 | KX379128 | NA       |
| <i>N. cvajcki</i> sp. n.   | NA674 | Velika jama nad Trebnjem, Trebnje           | 15.00723 | 45.89989 | KY617371 | KY617562 | NA       | KY617671 |
| <i>N. cvajcki</i> sp. n.   | NA675 | Velika jama nad Trebnjem, Trebnje           | 15.00723 | 45.89989 | KY617372 | KY617563 | NA       | KY617672 |
| <i>N. cvajcki</i> sp. n.   | NA676 | Velika jama nad Trebnjem, Trebnje           | 15.00723 | 45.89989 | KY617373 | KY617564 | NA       | KY617673 |
| <i>N. cvajcki</i> sp. n.   | NB795 | Šimenkova jama, Gradišče, Stična            | 14.81691 | 45.96071 | KY617400 | KY617588 | KY617500 | KY617690 |
| <i>N. cvajcki</i> sp. n.   | NB796 | Šimenkova jama, Gradišče, Stična            | 14.81691 | 45.96071 | KY617401 | KY617589 | KY617501 | KY617691 |
| <i>N. cvajcki</i> sp. n.   | NB797 | Šimenkova jama, Gradišče, Stična            | 14.81691 | 45.96071 | KY617402 | KY617590 | KY617502 | KY617692 |
| <i>N. cvajcki</i> sp. n.   | NB798 | Rivčja jama, Reberce, Žužemberk             | 14.87005 | 45.85604 | KY617403 | KY617591 | KY617503 | KY617693 |
| <i>N. cvajcki</i> sp. n.   | NB799 | Rivčja jama, Reberce, Žužemberk             | 14.87005 | 45.85604 | KY617404 | KY617592 | KY617504 | KY617694 |
| <i>N. cvajcki</i> sp. n.   | NB800 | Rivčja jama, Reberce, Žužemberk             | 14.87005 | 45.85604 | KY617405 | KY617593 | KY617505 | KY617695 |
| <i>N. cvajcki</i> sp. n.   | NB914 | Šolnovo brezno, Prevole, Žužemberk          | 14.85012 | 45.77781 | KY617433 | KY617617 | KY617529 | KY617711 |
| <i>N. cvajcki</i> sp. n.   | NB915 | Šolnovo brezno, Prevole, Žužemberk          | 14.85012 | 45.77781 | KY617434 | KY617618 | KY617530 | KY617712 |
| <i>N. cvijici</i>          | NA147 | Ravno, Popovo polje                         | 17.98643 | 42.89404 | JQ815554 | JQ815516 | KR905819 | NA       |
| <i>N. dalmatinus</i>       | NA060 | Biba, Vrana, Pakoštane                      | 15.57059 | 43.94897 | EF617296 | JQ815484 | KR905790 | KY617657 |
| <i>N. dancaui</i>          | NA152 | Valeni, Ploiesti, Prahova                   | 26.03001 | 44.94002 | KJ566693 | KJ566720 | KR905821 | NA       |
| <i>N. dobati</i>           | NA013 | Mali naravni most, Rakov škocjan, Rakek     | 14.30554 | 45.79097 | EF617247 | JQ815499 | KR905774 | NA       |
| <i>N. elegans</i>          | NA061 | San Pancrazio, Verona                       | 11.02106 | 45.42383 | EF617297 | JQ815485 | KR905791 | KY617658 |
| <i>N. elegans</i>          | NA518 | Reka Arno, Firenza                          | 11.25522 | 43.76780 | NA       | KY617561 | KY617482 | NA       |
| <i>N. fongi</i>            | NA018 | Dolga jama pri Koblarjih, Koblarji, Kočevje | 14.83005 | 45.71220 | EF617253 | JQ815472 | NA       | NA       |
| <i>N. frasassianus</i>     | NA    | Frassasi, Genga, Ancona                     | 12.96194 | 43.40083 | GU973411 | NA       | GU973135 | NA       |

|                                      |       |                                                       |          |          |          |          |          |          |
|--------------------------------------|-------|-------------------------------------------------------|----------|----------|----------|----------|----------|----------|
| <i>N. goricae</i> sp. n.             | NA085 | Vodnjak v Framu, Fram, Maribor                        | 15.63948 | 46.45543 | EU693305 | KR905888 | KR905803 | KY617654 |
| <i>N. goricae</i> sp. n.             | NB932 | Vodnjak v Ješenci, Ješenca, Rače                      | 15.65074 | 46.44123 | KY617447 | KY617631 | KY617534 | KY617724 |
| <i>N. goricae</i> sp. n.             | NC091 | Vodnjak v Senarci, Senarca, Lenart                    | 15.88860 | 46.55451 | KY617459 | KY617643 | KY617544 | KY617732 |
| <i>N. goricae</i> sp. n.             | NC092 | Vodnjak v Čakovi, Čakova,<br>Cerkvenjak               | 16.01478 | 46.58349 | NA       | NA       | KY617545 | NA       |
| <i>N. goricae</i> sp. n.             | NC093 | Vodnjak v Čakovi, Čakova,<br>Cerkvenjak               | 16.01478 | 46.58349 | KY617460 | NA       | KY617546 | NA       |
| <i>N. goricae</i> sp. n.             | NC094 | Vodnjak v Čakovi, Čakova,<br>Cerkvenjak               | 16.01478 | 46.58349 | KY617461 | KY617644 | KY617547 | KY617733 |
| <i>N. goricae</i> sp. n.             | NC095 | Luža v Lastomercih, Lastomerci,<br>Gornja Radgona     | 15.96048 | 46.63430 | KY617462 | KY617645 | KY617548 | KY617734 |
| <i>N. goricae</i> sp. n.             | NC096 | Luža v Lastomercih, Lastomerci,<br>Gornja Radgona     | 15.96048 | 46.63430 | KY617463 | KY617646 | KY617549 | KY617735 |
| <i>N. goricae</i> sp. n.             | NC097 | Luža v Lastomercih, Lastomerci,<br>Gornja Radgona     | 15.96048 | 46.63430 | KY617464 | KY617647 | KY617550 | KY617736 |
| <i>N. gottscheeanensis</i> sp.<br>n. | NA516 | Izvir SW od Sušja, Sušje, Ribnica                     | 14.68105 | 45.75300 | KY617466 | KY617648 | KY617551 | KY617738 |
| <i>N. gottscheeanensis</i> sp.<br>n. | NA706 | Podpeška jama, Podpeč,<br>Dobrepolje                  | 14.68632 | 45.83926 | KY617377 | KY617567 | KY617485 | KY617677 |
| <i>N. gottscheeanensis</i> sp.<br>n. | NA707 | Podpeška jama, Podpeč,<br>Dobrepolje                  | 14.68632 | 45.83926 | KY617378 | KY617568 | KY617486 | KY617678 |
| <i>N. gottscheeanensis</i> sp.<br>n. | NB789 | Jama v Kamnolomu, Vinica,<br>Črnomelj                 | 15.24431 | 45.45443 | KY617394 | NA       | KY617496 | KY617686 |
| <i>N. gottscheeanensis</i> sp.<br>n. | NB790 | Židovske kuće, Budinjak,<br>Žumberak                  | 15.50069 | 45.78829 | KY617395 | KY617583 | NA       | NA       |
| <i>N. gottscheeanensis</i> sp.<br>n. | NB844 | Željnske jame, Željne, Kočevje                        | 14.88488 | 45.65427 | KY617412 | KY617600 | KY617512 | KY617699 |
| <i>N. gottscheeanensis</i> sp.<br>n. | NB845 | Željnske jame, Željne, Kočevje                        | 14.88488 | 45.65427 | KY617413 | KY617601 | KY617513 | KY617700 |
| <i>N. gottscheeanensis</i> sp.<br>n. | NB925 | Izviri NW od Kočevske reke,<br>Kočevska reka, Kočevje | 14.78968 | 45.58124 | KY617440 | KY617624 | KY617533 | KY617717 |
| <i>N. gottscheeanensis</i> sp.<br>n. | NB926 | Izviri NW od Kočevske reke,<br>Kočevska reka, Kočevje | 14.78968 | 45.58124 | KY617441 | KY617625 | NA       | KY617718 |
| <i>N. gottscheeanensis</i> sp.<br>n. | NB927 | Izviri NW od Kočevske reke,<br>Kočevska reka, Kočevje | 14.78968 | 45.58124 | KY617442 | KY617626 | NA       | KY617719 |
| <i>N. gottscheeanensis</i> sp.       | NC076 | Izvir ob Obrhu, Mirtoviči, Osilnica                   | 14.77907 | 45.51913 | KY617449 | KY617634 | KY617537 | KY617726 |

| n.                           |             |                                             |          |          |          |          |          |          |  |
|------------------------------|-------------|---------------------------------------------|----------|----------|----------|----------|----------|----------|--|
| <i>N. hadzii</i>             | NA082       | Izvir pod orehom, Verd, Vrhnika             | 14.29966 | 45.95250 | EU693301 | KR905887 | KR905800 | KY617660 |  |
| <i>N. illidzensis</i>        | NA084       | Vrelo Bosne, Ilidža, Sarajevo               | 18.26724 | 43.81927 | EU693304 | JQ815491 | KR905802 | KY617661 |  |
| <i>N. iskae</i> sp. n.       | NB619       | Mačji rep, Škrabče, Nova vas                | 14.53212 | 45.81361 | KY617382 | KY617571 | KY617490 | NA       |  |
| <i>N. iskae</i> sp. n.       | NC087       | Mačji rep, Škrabče, Nova vas                | 14.53212 | 45.81361 | KY617455 | KY617640 | KY617542 | KY617730 |  |
| <i>N. iskae</i> sp. n.       | NC088       | Mačji rep, Škrabče, Nova vas                | 14.53212 | 45.81361 | KY617456 | KY617641 | KY617543 | KY617731 |  |
| <i>N. kapelanus</i> sp. n.   | NB625       | Špilja pod Mačkovom dragom, Vrelo, Jasenak  | 15.02382 | 45.26099 | KY617387 | KY617576 | KY617494 | NA       |  |
| <i>N. karamani</i>           | NB933       | Vodnjak v Pečkah, pečke, Majšperk           | 15.67440 | 46.33390 | NA       | KY617632 | KY617535 | NA       |  |
| <i>N. kenki</i>              | NA086       | Izvir v Sodni vasi, Sodna vas, Podčetrtak   | 15.59486 | 46.17618 | KR905869 | KY617556 | KR905804 | KY617662 |  |
| <i>N. kenki</i>              | NA087       | Polje of Sotli, Bistrica ob Sotli, Brežice  | 15.66410 | 46.06790 | EU693306 | NA       | KY617476 | KY617663 |  |
| <i>N. kenki</i>              | NA201       | Marijino brezno, Lubnik, Škofja loka        | 14.29633 | 46.16465 | KY617368 | KY617559 | KY617479 | KY617669 |  |
| <i>N. kenki</i>              | NA236       | Ljubljana freatik, Tomačevo, Ljubljana      | 14.54057 | 46.08281 | KY617369 | KY617560 | KY617480 | KY617670 |  |
| <i>N. kenki</i>              | NA239       | Ljubljana freatik, Sneberje, Ljubljana      | 14.57312 | 46.08043 | KY617370 | NA       | KY617481 | NA       |  |
| <i>N. kolombatovici</i>      | NA964/NA963 | Žira, Dobri do, Popovo polje                | 17.88478 | 42.91670 | JQ815553 | JQ815522 | KT007386 | NA       |  |
| <i>N. kordunensis</i> sp. n. | NB623       | Matešička špilja, Matešiči, Slunj           | 15.61389 | 45.10808 | KY617386 | KY617575 | NA       | NA       |  |
| <i>N. kordunensis</i> sp. n. | NC089       | Matešička špilja, Matešiči, Slunj           | 15.61389 | 45.10808 | KY617457 | NA       | NA       | NA       |  |
| <i>N. kordunensis</i> sp. n. | NC090       | Matešička špilja, Matešiči, Slunj           | 15.61389 | 45.10808 | KY617458 | KY617642 | NA       | NA       |  |
| <i>N. krameri</i>            | NA040       | Stranski pritok Fojbe, Šestani, Pazin       | 13.98650 | 45.24621 | EF617275 | JQ815503 | NA       | NA       |  |
| <i>N. labacensis</i>         | NA022       | Ljubljana freatik, Tomačevo, Ljubljana      | 14.54057 | 46.08280 | EF617257 | JQ815474 | KR905777 | NA       |  |
| <i>N. lessiniensis</i>       | NA064       | Grotta dell Aqua, Ponte di Veja, Verona,ITA | 10.97021 | 45.60815 | EF617300 | JQ815488 | KR905794 | NA       |  |
| <i>N. likanus</i>            | NB917       | Đula-Medvednica, Ogulin                     | 15.22399 | 45.26704 | KY617435 | KY617619 | NA       | KY617713 |  |
| <i>N. likanus</i>            | NB918       | Đula-Medvednica, Ogulin                     | 15.22399 | 45.26704 | KY617436 | KY617620 | NA       | KY617714 |  |
| <i>N. likanus</i>            | NB922       | Izvir v Juzbašičih, Juzbašiči, Tounj        | 15.42788 | 45.19763 | KY617437 | KY617621 | KY617531 | KY617715 |  |
| <i>N. likanus</i>            | NB923       | Izvir v Juzbašičih, Juzbašiči, Tounj        | 15.42788 | 45.19763 | KY617438 | KY617622 | KY617532 | KY617716 |  |

|                                |       |                                            |          |          |          |          |          |          |
|--------------------------------|-------|--------------------------------------------|----------|----------|----------|----------|----------|----------|
| <i>N. likanus</i>              | NB924 | Izvir v Juzbašičih, Juzbašiči, Tounj       | 15.42788 | 45.19763 | KY617439 | KY617623 | NA       | NA       |
| <i>N. longicaudatus</i> [Cres] | NA006 | Retec, Lubenice, Cres                      | 14.33641 | 44.88768 | EF617240 | KJ566705 | KR905772 | NA       |
| <i>N. longicaudatus</i> [N]    | NA007 | Monte Faito, Vasola, Napoli                | 14.46006 | 40.66946 | EF617241 | JQ815469 | NA       | NA       |
| <i>N. longidactylus</i>        | NA021 | Ljubljana freatik, Sneberje, Ljubljana     | 14.57311 | 46.08042 | EF617256 | JQ815473 | NA       | NA       |
| <i>N. longiflagellum</i>       | NA093 | Podpeška jama, Podpeč, Dobropolje          | 14.68632 | 45.83926 | EU693311 | JQ815520 | KR905805 | KR905840 |
| <i>N. malagorae</i> sp. n.     | NB621 | Vančeva jama, Koblarji, Kočevje            | 14.82263 | 45.70310 | KY617384 | KY617573 | KY617492 | KY617682 |
| <i>N. malagorae</i> sp. n.     | NB857 | Mivčje jama, Gornje Lepovčje, Ribnica      | 14.73370 | 45.75350 | KY617421 | KY617605 | NA       | NA       |
| <i>N. malagorae</i> sp. n.     | NB858 | Mivčje jama, Gornje Lepovčje, Ribnica      | 14.73370 | 45.75350 | KY617422 | KY617606 | KY617521 | NA       |
| <i>N. malagorae</i> sp. n.     | NB859 | Mivčje jama, Gornje Lepovčje, Ribnica      | 14.73370 | 45.75350 | KY617423 | KY617607 | KY617522 | NA       |
| <i>N. malagorae</i> sp. n.     | NC083 | Vančeva jama, Koblarji, Kočevje            | 14.82263 | 45.70310 | KY617452 | KY617637 | KY617540 | NA       |
| <i>N. malagorae</i> sp. n.     | NC084 | Vančeva jama, Koblarji, Kočevje            | 14.82263 | 45.70310 | KY617453 | KY617638 | KY617541 | KY617729 |
| <i>N. novomestanus</i>         | NA096 | Tominčev studenc, Žužemberk                | 14.96855 | 45.79628 | EU693314 | JQ815509 | KR858496 | KY617740 |
| <i>N. novomestanus</i>         | NA097 | Tominčev studenc, Žužemberk                | 14.96855 | 45.79628 | KY617469 | KY617650 | KY617552 | KY617741 |
| <i>N. novomestanus</i>         | NA098 | izvir Gabrovčec, Gabrovčec, Krška vas      | 14.80170 | 45.88089 | KY617364 | KY617554 | KY617473 | KY617653 |
| <i>N. novomestanus</i>         | NA131 | Jama pod gradom Luknja, Prečna, Novo mesto | 15.09978 | 45.81841 | KY617365 | KY617555 | KY617474 | KY617655 |
| <i>N. novomestanus</i>         | NA178 | Sela pri Straži, Straža, Novo mesto        | 15.09644 | 45.78730 | KY617467 | KY617649 | NA       | NA       |
| <i>N. novomestanus</i>         | NA708 | Vodanjak v Podgori, Podgora, Prečna        | 15.10222 | 45.80784 | KY617379 | KY617569 | KY617487 | NA       |
| <i>N. novomestanus</i>         | NB617 | Rupa na Brodu, Šmihel, Novo mesto          | 15.14429 | 45.78885 | KY617381 | KY617570 | KY617489 | KY617680 |
| <i>N. novomestanus</i>         | NB786 | Vodanjak v Podgori, Podgora, Prečna        | 15.10222 | 45.80784 | KY617391 | NA       | NA       | KY617684 |
| <i>N. novomestanus</i>         | NB787 | Vodanjak v Podgori, Podgora, Prečna        | 15.10222 | 45.80784 | KY617392 | KY617581 | NA       | KY617685 |
| <i>N. novomestanus</i>         | NB788 | Vodanjak v Podgori, Podgora, Prečna        | 15.10222 | 45.80784 | KY617393 | KY617582 | KY617495 | NA       |
| <i>N. novomestanus</i>         | NB791 | Židovske kuće, Budinjak, Žumberak          | 15.50069 | 45.78829 | KY617396 | KY617584 | NA       | NA       |

|                        |       |                                                 |          |          |          |          |          |          |
|------------------------|-------|-------------------------------------------------|----------|----------|----------|----------|----------|----------|
| <i>N. pachytelson</i>  | NA100 | Podpeška jama, Podpeč,<br>Dobropolje            | 14.68632 | 45.83926 | EU693316 | JQ815511 | KR905809 | KR905841 |
| <i>N. pasquinii</i>    | NA010 | Sorgenti san Vittorino, San<br>Vittorino, Rieti | 12.99077 | 42.37629 | EF617244 | JQ815471 | KR905773 | NA       |
| <i>N. pectinicauda</i> | NA023 | Ljubljana freatik, Tomačevo,<br>Ljubljana       | 14.54057 | 46.08280 | EF617258 | JQ815475 | KR905778 | NA       |
| <i>N. podpecanus</i>   | NA101 | Podpeška jama, Podpeč,<br>Dobropolje            | 14.68632 | 45.83926 | EU693317 | JQ815512 | KR905810 | NA       |
| <i>N. podpecanus</i>   | NA693 | Slugova jama, Golobinjek,<br>Dolenjske toplice  | 15.05148 | 45.84125 | KY617374 | NA       | KY617483 | KY617674 |
| <i>N. podpecanus</i>   | NA704 | Izvir pri črpališčuvska vas,<br>Kočevje         | 14.83022 | 45.66765 | KY617375 | KY617565 | KY617484 | KY617675 |
| <i>N. podpecanus</i>   | NA705 | Izvir pri črpališčuvska vas,<br>Kočevje         | 14.83022 | 45.66765 | KY617376 | KY617566 | NA       | KY617676 |
| <i>N. podpecanus</i>   | NB620 | Izvir ob Obrhu, Mirtoviči, Osilnica             | 14.77907 | 45.51913 | KY617383 | KY617572 | KY617491 | KY617681 |
| <i>N. podpecanus</i>   | NB622 | Krška jama, Gradiček, Krška vas                 | 14.77126 | 45.88999 | KY617385 | KY617574 | KY617493 | KY617683 |
| <i>N. podpecanus</i>   | NB843 | Željnske jame, Željne, Kočevje                  | 14.88488 | 45.65427 | KY617411 | KY617599 | KY617511 | KY617698 |
| <i>N. podpecanus</i>   | NB863 | Črničkova jama, Stavča vas,<br>Žužemberk        | 14.96267 | 45.80824 | KY617427 | KY617611 | KY617523 | KY617706 |
| <i>N. podpecanus</i>   | NB864 | Črničkova jama, Stavča vas,<br>Žužemberk        | 14.96267 | 45.80824 | KY617428 | KY617612 | KY617524 | KY617707 |
| <i>N. podpecanus</i>   | NB865 | Črničkova jama, Stavča vas,<br>Žužemberk        | 14.96267 | 45.80824 | KY617429 | KY617613 | KY617525 | KY617708 |
| <i>N. podpecanus</i>   | NB910 | Lučka jama, Luče, Grosuplje                     | 14.72514 | 45.91778 | KY617430 | KY617614 | KY617526 | NA       |
| <i>N. podpecanus</i>   | NB911 | Lučka jama, Luče, Grosuplje                     | 14.72514 | 45.91778 | KY617431 | KY617615 | KY617527 | KY617709 |
| <i>N. podpecanus</i>   | NB912 | Lučka jama, Luče, Grosuplje                     | 14.72514 | 45.91778 | KY617432 | KY617616 | KY617528 | KY617710 |
| <i>N. podpecanus</i>   | NB928 | Jama v Peklu, Rajndol, Kočevje                  | 14.97470 | 45.56470 | KY617443 | KY617627 | NA       | KY617720 |
| <i>N. podpecanus</i>   | NB929 | Jama v Peklu, Rajndol, Kočevje                  | 14.97470 | 45.56470 | KY617444 | KY617628 | NA       | KY617721 |
| <i>N. podpecanus</i>   | NB930 | Jama v Peklu, Rajndol, Kočevje                  | 14.97470 | 45.56470 | KY617445 | KY617629 | NA       | KY617722 |
| <i>N. podpecanus</i>   | NC075 | Izvir ob Obrhu, Mirtoviči, Osilnica             | 14.77907 | 45.51913 | KY617448 | KY617633 | KY617536 | KY617725 |
| <i>N. podpecanus</i>   | NC081 | Krška jama, Gradiček, Krška vas                 | 14.77126 | 45.88999 | KY617450 | KY617635 | KY617538 | KY617727 |
| <i>N. podpecanus</i>   | NC082 | Krška jama, Gradiček, Krška vas                 | 14.77126 | 45.88999 | KY617451 | KY617636 | KY617539 | KY617728 |
| <i>N. parapupetta</i>  | NA102 | Ljubljana freatik, Tomačevo,<br>Ljubljana       | 14.54057 | 46.08280 | EU693318 | KJ566717 | NA       | NA       |

|                        |       |                                         |          |          |          |          |          |          |
|------------------------|-------|-----------------------------------------|----------|----------|----------|----------|----------|----------|
| <i>N. puteanus</i>     | NA066 | Gasthof Zur Walba, Pentling, Regensburg | 12.03579 | 48.97457 | EF617302 | KJ566709 | KR905795 | NA       |
| <i>N. rejici</i>       | NA048 | Podpeško jezero, Podpeč, Ig             | 14.43211 | 45.96840 | EF617283 | JQ815481 | KR905785 | KR905833 |
| <i>N. slovenicus</i>   | NA106 | Stražišče, Kranj                        | 14.33766 | 46.22713 | EU693322 | JQ815493 | KR905813 | KY617666 |
| <i>N. sphagnicolus</i> | NA035 | Mostec, Rožnik, Ljubljana               | 14.47319 | 46.06115 | EF617270 | NA       | KR858495 | NA       |
| <i>N. spoeckeri</i>    | NA108 | Pivka jama, Veliki otok, Postojna       | 14.20451 | 45.80459 | EU693324 | JQ815513 | KR905814 | KY617667 |
| <i>N. spoeckeri</i>    | NA179 | Zelške jame, Zelše, Cerknica            | 14.30349 | 45.79065 | KY617367 | KY617558 | KY617478 | NA       |
| <i>N. stygius</i>      | NA110 | Jelenska jama, Borovnica, Vrhnika       | 14.35549 | 45.91790 | KR905870 | KR905890 | KR905815 | NA       |
| <i>N. stygius</i>      | NA123 | Predjamski sistem, Bukovje, Postojna    | 14.12660 | 45.81567 | EU693325 | JQ815515 | KR858498 | NA       |
| <i>N. stygius</i>      | NA678 | Vogršček, Avče, Nova Gorica             | 13.71233 | 46.12534 | KY617472 | NA       | NA       | KY617744 |
| <i>N. stygius</i>      | NA733 | Šumnik, Lepena, Bovec                   | 13.64978 | 46.31890 | KY617468 | NA       | NA       | KY617739 |
| <i>N. stygius</i>      | NA735 | Marijino brezno, Lubnik, Škofja loka    | 14.29633 | 46.16465 | KY617366 | NA       | NA       | KY617656 |
| <i>N. stygius</i>      | NA758 | Bunker in Visintini, Dobredob, Gorica   | 13.56694 | 45.86639 | KY617471 | NA       | NA       | KY617743 |
| <i>N. stygius</i>      | NA788 | Studenec nad sv. Marjeto, Palčje, Pivka | 14.26950 | 45.68906 | KY617465 | NA       | NA       | KY617737 |
| <i>N. stygius</i>      | NA873 | Čendova jama, Klavže, Šentviška gora    | 13.82258 | 46.14960 | KY617363 | NA       | NA       | KY617652 |
| <i>N. timavi</i>       | NA114 | Labodnica, Trebče, Trst                 | 13.82859 | 45.68448 | EU693327 | JQ815495 | KR858497 | NA       |
| <i>N. tridentinus</i>  | NA063 | Grotta Bus Pursi, Lumezzane, Brescia    | 10.27419 | 45.64601 | EF617299 | JQ815487 | KR905793 | NA       |
| <i>N. vinodolensis</i> | NA062 | Cerovići, Bačići, Novi Vinodolski       | 14.64687 | 45.23345 | EF617298 | JQ815486 | KR905792 | KY617659 |
| <i>N. wolfi</i>        | NA015 | Križna jama, Bločice, Lož               | 14.46727 | 45.74519 | EF617250 | JQ815500 | KR905775 | NA       |
| <i>N. zagrebensis</i>  | NA059 | Gadina, Loka, Črnomelj                  | 15.18202 | 45.56461 | EF617295 | KR905886 | KR905789 | NA       |
| <i>N. zagrebensis</i>  | NA117 | Čučerje, Dubrava, Zagreb                | 16.06069 | 45.89635 | EU693330 | KY617557 | KY617477 | KY617668 |
| <i>N. zagrebensis</i>  | NA709 | Kočevske poljane, Dolenjske toplice     | 15.05483 | 45.72460 | KY617380 | NA       | KY617488 | KY617679 |
| <i>N. zagrebensis</i>  | NB783 | Izvir v Jurišah, Juriše, Ozalj          | 15.47533 | 45.56973 | KY617388 | KY617578 | NA       | NA       |
| <i>N. zagrebensis</i>  | NB784 | Izvir v Jurišah, Juriše, Ozalj          | 15.47533 | 45.56973 | KY617389 | KY617579 | NA       | NA       |
| <i>N. zagrebensis</i>  | NB785 | Izvir v Jurišah, Juriše, Ozalj          | 15.47533 | 45.56973 | KY617390 | KY617580 | NA       | NA       |
| <i>N. zagrebensis</i>  | NB846 | Božakovska jama, Božakovo, Metlika      | 15.37489 | 45.64777 | KY617414 | NA       | KY617514 | NA       |



|                       |       |                                       |          |          |          |          |          |          |
|-----------------------|-------|---------------------------------------|----------|----------|----------|----------|----------|----------|
| <i>N. zagrebensis</i> | NB847 | Božakovska jama, Božakovo,<br>Metlika | 15.37489 | 45.64777 | KY617415 | NA       | KY617515 | KY617701 |
| <i>N. zagrebensis</i> | NB848 | Božakovska jama, Božakovo,<br>Metlika | 15.37489 | 45.64777 | KY617416 | NA       | KY617516 | KY617702 |
| <i>N. zagrebensis</i> | NB850 | Gadina, Loka, Črnomelj                | 15.18202 | 45.56461 | KY617417 | KY617602 | KY617517 | KY617703 |
| <i>N. zagrebensis</i> | NB851 | Gadina, Loka, Črnomelj                | 15.18202 | 45.56461 | KY617418 | NA       | KY617518 | NA       |

## Supplementary Material 2. Details on molecular analyses

[Supplementary information to Materials and Methods and Results]

### Materials and Methods

For PCR amplification of the studied DNA sequences, we used the primers listed in Table S2. For Bayesian phylogenetic analyses, we selected evolutionary models by gene partitions as proposed using PartitionFinder<sup>1</sup>. The selected models are presented Table S2. Multilocus coalescence analysis using BPP was run under a number of conditions. The conditions and detailed results are listed in Table S3. In Fig. S1 we show the full phylogenetic tree with all individuals used in the analysis.

Supplementary Table S2. List of primers and selected evolutionary models.

| Gene                                     | Primers           | Partition in concatenated dataset | Best Substitution Model |
|------------------------------------------|-------------------|-----------------------------------|-------------------------|
| 28S rRNA <sup>2</sup>                    | 28S lev2-28S des2 | 1-902                             | K80+G+I                 |
| Histone H3 <sup>3</sup>                  | H3aF2-H3aR2       | 903-1232\3                        | JC                      |
|                                          |                   | 904-1232\3                        | JC                      |
|                                          |                   | 905-1232\3                        | GTR+G                   |
| Cytochrome Oxidase I <sup>*4,5</sup>     | LCO- COIspr1      | 1233-1799\3                       | SYM+G                   |
|                                          |                   | 1234-1799\3                       | F81+G+I                 |
|                                          |                   | 1235-1799\3                       | GTR+G                   |
| Internal Transcribed Spacer <sup>6</sup> | ITSf1-ITSr1       | 1800 - 5425                       | K80+G+I                 |

\*The COI gener was used in uni- and multilocus analyses. The selected evolutionary models were identical for both analyses.

Supplementary Table S3. Results of multilocus coalescence species delimitation analysis using the program BPP, indicating the probability for maximum number of species estimated under various settings. Three separate analyses were run, for each clade separately.

| prior $\theta$                                | prior $\tau$         | algorithm 0                                                                                                                       | algorithm 1                                                                                                                      |
|-----------------------------------------------|----------------------|-----------------------------------------------------------------------------------------------------------------------------------|----------------------------------------------------------------------------------------------------------------------------------|
| <i>Niphargus karamani</i>                     |                      |                                                                                                                                   |                                                                                                                                  |
| large pop., deep div.<br>G (1, 10)            | G (1, 10)            | <b>1 (2 spp.)</b><br>0.00 (1 spp.)                                                                                                | <b>1 (2 spp.)</b><br>0.00 (1 spp.)                                                                                               |
| small pop., shallow div.<br>2000) G (2, 2000) | G (2,<br>G (2, 2000) | <b>0.9998 (2 spp.)</b><br>0.0002 (1 spp.)                                                                                         | <b>0.9996 (2 spp.)</b><br>0.0004 (1 spp.)                                                                                        |
| large pop., shallow div.<br>G (2, 2000)       | G (1, 10)            | <b>1 (2 spp.)</b><br>0.00 (1 spp.)                                                                                                | <b>1 (2 spp.)</b><br>0.00 (1 spp.)                                                                                               |
| <i>Niphargus kenki</i>                        |                      |                                                                                                                                   |                                                                                                                                  |
| large pop., deep div.<br>G (1, 10)            | G (1, 10)            | <b>0.84673 (2 spp.)</b><br>0.15327 (1 spp.)                                                                                       | <b>0.84983 (2 spp.)</b><br>0.15017 (1 spp.)                                                                                      |
| small pop., shallow div.<br>2000) G (2, 2000) | G (2,<br>G (2, 2000) | <b>0.99893 (2 spp.)</b><br>0.00107 (1 spp.)                                                                                       | <b>0.99433 (2 spp.)</b><br>0.00567 (1 spp.)                                                                                      |
| large pop., shallow div.<br>G (2, 2000)       | G (1, 10)            | <b>0.99527 (2 spp.)</b><br>0.00473 (1 spp.)                                                                                       | <b>0.99683 (2 spp.)</b><br>0.00317 (1 spp.)                                                                                      |
| <i>Niphargus novomestanus complex</i>         |                      |                                                                                                                                   |                                                                                                                                  |
| large pop., deep div.<br>G (1, 10)            | G (1, 10)            | <b>0.42513 (19 spp.)</b><br>0.36247 (18 spp.)<br>0.1637 (17 spp.)<br>0.04307 (16 spp.)<br>0.00563 (15 spp.)                       | <b>0.42527 (19 spp.)</b><br>0.34827 (18 spp.)<br>0.16907 (17 spp.)<br>0.0503 (16 spp.)<br>0.00677 (15 spp.)<br>0.00033 (14 spp.) |
| small pop., shallow div.<br>2000) G (2, 2000) | G (2,<br>G (2, 2000) | <b>0.90763 (19 spp.)</b><br>0.07187 (18 spp.)<br>0.0202 (17 spp.)<br>0.0003 (16 spp.)                                             | <b>0.84773 (19 spp.)</b><br>0.14303 (18 spp.)<br>0.009 (17 spp.)<br>0.00023 (16 spp.)                                            |
| large pop., shallow div.<br>G (2, 2000)       | G (1, 10)            | <b>0.54687 (19 spp.)</b><br>0.32733 (18 spp.)<br>0.10317 (17 spp.)<br>0.01923 (16 spp.)<br>0.00323 (15 spp.)<br>0.00017 (14 spp.) | <b>0.64333 (19 spp.)</b><br>0.27437 (18 spp.)<br>0.0679 (17 spp.)<br>0.0138 (16 spp.)<br>0.0006 (15 spp.)<br>/                   |

$\theta$  – population size;  $\tau$  – time of divergence; Algorithm 0 and 1 – two alternative reversible-jump proposals used in multilocus species delimitation, the two algorithms differ in how they calculate ancestral  $\theta$  values.

Table S4. Pairwise COI gene distances in between studied *Niphargus* species. Above the diagonal are K2P distances (threshold 0.04), below patristic distances (threshold 0.16). Presented are mean values, minimum and maximum values are in brackets. Pairs below the thresholds<sup>1</sup> are presented in boldface.

|                        | <i>N. goricae</i> | <i>N. karamani</i> | <i>N. cvajcki</i> | <i>N. spoeckeri</i>  | <i>N. iskae</i> | <i>N. kapelanus</i> | <i>N. zagrebensis</i> | <i>N. likanus</i> | <i>N. brachytelson</i> | <i>N. malagorae</i> | <i>N. gottschi</i>   | <i>N. novomest.</i> | <i>N. podpecanus</i> | <i>N. chagankae</i> | <i>N. kenki</i> | <i>N. stygius</i> |
|------------------------|-------------------|--------------------|-------------------|----------------------|-----------------|---------------------|-----------------------|-------------------|------------------------|---------------------|----------------------|---------------------|----------------------|---------------------|-----------------|-------------------|
|                        |                   | 0.096              | 0.193             | 0.200                | 0.212           | 0.164               | 0.174                 | 0.167             | 0.191                  | 0.195               | 0.174                | 0.185               | 0.188                | 0.217               | 0.190           | 0.198             |
| <i>N. goricae</i>      |                   | (0.092-0.099)      | (0.187-0.200)     | (0.190-0.209)        | (0.207-0.217)   | (0.161-0.166)       | (0.166-0.179)         | (0.165-0.167)     | (0.190-0.192)          | (0.188-0.201)       | (0.164-0.179)        | (0.178-0.203)       | (0.183-0.193)        | (0.204-0.234)       | (0.181-0.020)   | (0.192-0.202)     |
|                        | 0.163             |                    | 0.179             | 0.176                | 0.192           | 0.175               | 0.173                 | 0.161             | 0.183                  | 0.188               | 0.163                | 0.170               | 0.179                | 0.193               | 0.164           | 0.194             |
| <i>N. karamani</i>     | (0.155-0.167)     |                    | (0.175-0.187)     | (0.169-0.183)        | (0.191-0.193)   | (0.175-0.175)       | (0.168-0.183)         | (0.161-0.161)     | (0.183-0.183)          | (0.185-0.19)        | (0.159-0.166)        | (0.163-0.188)       | (0.168-0.183)        | (0.188-0.205)       | (0.161-0.166)   | (0.194-0.194)     |
|                        | 0.441             | 0.458              |                   | 0.156                | 0.175           | 0.154               | 0.165                 | 0.163             | 0.1925                 | 0.177               | 0.153                | 0.154               | 0.170                | 0.169               | 0.167           | 0.173             |
| <i>N. cvajcki</i>      | (0.424-0.459)     | (0.448-0.471)      |                   | (0.143-0.171)        | (0.168-0.185)   | (0.147-0.168)       | (0.156-0.175)         | (0.159-0.168)     | (0.189-0.200)          | (0.172-0.18)        | (0.145-0.161)        | (0.145-0.169)       | (0.158-0.192)        | (0.163-0.176)       | (0.154-0.189)   | (0.168-0.184)     |
|                        | 0.491             | 0.508              | 0.506             |                      | 0.085           | 0.129               | 0.146                 | 0.117             | 0.145                  | 0.145               | 0.113                | 0.123               | 0.123                | 0.156               | 0.147           | 0.159             |
| <i>N. spoeckeri</i>    | (0.471-0.507)     | (0.496-0.520)      | (0.485-0.533)     |                      | (0.078-0.092)   | (0.120-0.138)       | (0.136-0.158)         | (0.109-0.124)     | (0.138-0.152)          | (0.136-0.154)       | (0.103-0.125)        | (0.107-0.136)       | (0.109-0.138)        | (0.143-0.168)       | (0.136-0.156)   | (0.149-0.168)     |
|                        | 0.497             | 0.513              | 0.511             | <b>0.136</b>         |                 | 0.141               | 0.152                 | 0.130             | 0.135                  | 0.163               | 0.128                | 0.133               | 0.122                | 0.161               | 0.134           | 0.151             |
| <i>N. iskae</i>        | (0.487-0.501)     | (0.511-0.514)      | (0.501-0.526)     | <b>(0.122-0.149)</b> |                 | (0.140-0.142)       | (0.147-0.161)         | (0.129-0.131)     | (0.133-0.136)          | (0.161-0.164)       | (0.124-0.131)        | (0.127-0.136)       | (0.115-0.129)        | (0.154-0.166)       | (0.127-0.143)   | (0.150-0.152)     |
|                        | 0.471             | 0.487              | 0.486             | 0.266                | 0.271           |                     | 0.125                 | 0.124             | 0.138                  | 0.131               | 0.123                | 0.125               | 0.119                | 0.167               | 0.135           | 0.140             |
| <i>N. kapelanus</i>    | (0.462-0.474)     | (0.487-0.487)      | (0.477-0.500)     | (0.254-0.278)        | (0.270-0.272)   |                     | (0.118-0.129)         | (0.124-0.124)     | (0.138-0.138)          | (0.129-0.133)       | (0.122-0.127)        | (0.118-0.133)       | (0.113-0.124)        | (0.159-0.175)       | (0.129-0.140)   | (0.140-0.140)     |
| <i>N. zagrebensis</i>  | 0.520             | 0.536              | 0.534             | 0.315                | 0.320           | 0.272               |                       | 0.120             | 0.124                  | 0.101               | 0.111                | 0.110               | 0.093                | 0.132               | 0.134           | 0.142             |
|                        | (0.507-0.533)     | (0.531-0.546)      | (0.521-0.559)     | (0.298-0.337)        | (0.314-0.331)   | (0.267-0.282)       |                       | (0.118-0.122)     | (0.12-0.136)           | (0.096-0.111)       | (0.102-0.116)        | (0.100-0.116)       | (0.083-0.107)        | (0.116-0.150)       | (0.118-0.152)   | (0.140-0.147)     |
|                        | 0.519             | 0.534              | 0.533             | 0.314                | 0.318           | 0.270               | 0.246                 |                   | 0.116                  | 0.116               | 0.076                | 0.090               | 0.112                | 0.124               | 0.135           | 0.142             |
| <i>N. likanus</i>      | (0.510-0.522)     | (0.534-0.534)      | (0.524-0.547)     | (0.302-0.326)        | (0.317-0.319)   | (0.270-0.270)       | (0.241-0.256)         |                   | (0.116-0.116)          | (0.114-0.120)       | (0.073-0.082)        | (0.079-0.103)       | (0.105-0.118)        | (0.118-0.129)       | (0.133-0.138)   | (0.142-0.142)     |
| <i>N. brachytelson</i> | 0.580             | 0.591              | 0.590             | 0.371                | 0.375           | 0.327               | 0.303                 | 0.266             |                        | 0.084               | 0.114                | 0.116               | 0.116                | 0.144               | 0.142           | 0.166             |
|                        | (0.567-0.579)     | (0.591-0.591)      | (0.581-0.604)     | (0.359-0.383)        | (0.374-0.376)   | (0.327-0.327)       | (0.298-0.313)         | (0.266-0.266)     |                        | (0.082-0.085)       | (0.111-0.116)        | (0.109-0.130)       | (0.111-0.127)        | (0.132-0.152)       | (0.133-0.152)   | (0.166-0.166)     |
|                        | 0.552             | 0.568              | 0.566             | 0.347                | 0.352           | 0.304               | 0.279                 | 0.243             | <b>0.139</b>           |                     | 0.103                | 0.109               | 0.100                | 0.131               | 0.150           | 0.165             |
| <i>N. malagorae</i>    | (0.540-0.560)     | (0.564-0.572)      | (0.554-0.585)     | (0.331-0.364)        | (0.347-0.357)   | (0.300-0.308)       | (0.271-0.294)         | (0.239-0.247)     | <b>(0.135-0.143)</b>   |                     | (0.098-0.109)        | (0.101-0.121)       | (0.094-0.109)        | (0.120-0.143)       | (0.145-0.154)   | (0.163-0.168)     |
|                        | 0.529             | 0.545              | 0.543             | 0.324                | 0.329           | 0.281               | 0.256                 | 0.220             | 0.257                  | 0.234               |                      | 0.060               | 0.089                | 0.114               | 0.140           | 0.154             |
| <i>N. gottschi</i>     | (0.517-0.537)     | (0.542-0.549)      | (0.532-0.562)     | (0.309-0.341)        | (0.325-0.334)   | (0.278-0.285)       | (0.248-0.271)         | (0.216-0.224)     | (0.254-0.261)          | (0.227-0.242)       |                      | (0.055-0.065)       | (0.081-0.098)        | (0.103-0.127)       | (0.133-0.147)   | (0.147-0.159)     |
|                        | 0.524             | 0.541              | 0.539             | 0.320                | 0.325           | 0.276               | 0.252                 | 0.215             | 0.253                  | 0.229               | <b>0.115</b>         |                     | 0.094                | 0.098               | 0.138           | 0.149             |
| <i>N. novomest.</i>    | (0.507-0.535)     | (0.532-0.548)      | (0.522-0.560)     | (0.299-0.339)        | (0.315-0.333)   | (0.268-0.283)       | (0.239-0.269)         | (0.207-0.222)     | (0.244-0.260)          | (0.217-0.241)       | <b>(0.103-0.126)</b> |                     | (0.085-0.105)        | (0.083-0.116)       | (0.131-0.147)   | (0.138-0.156)     |
|                        | 0.562             | 0.578              | 0.577             | 0.357                | 0.362           | 0.314               | 0.289                 | 0.253             | 0.290                  | 0.267               | 0.223                | 0.218               |                      | 0.113               | 0.147           | 0.142             |
| <i>N. podpec.</i>      | (0.545-0.571)     | (0.570-0.584)      | (0.560-0.597)     | (0.337-0.375)        | (0.353-0.369)   | (0.306-0.320)       | (0.277-0.305)         | (0.245-0.259)     | (0.282-0.296)          | (0.255-0.277)       | (0.212-0.233)        | (0.202-0.231)       |                      | (0.105-0.120)       | (0.135-0.154)   | (0.135-0.144)     |
|                        | 0.646             | 0.662              | 0.660             | 0.441                | 0.446           | 0.398               | 0.373                 | 0.337             | 0.374                  | 0.350               | 0.307                | 0.302               | 0.298                |                     | 0.155           | 0.160             |
| <i>N. chagankae</i>    | (0.612-0.675)     | (0.637-0.688)      | (0.627-0.700)     | (0.404-0.479)        | (0.420-0.473)   | (0.373-0.423)       | (0.343-0.409)         | (0.311-0.362)     | (0.349-0.400)          | (0.322-0.381)       | (0.278-0.337)        | (0.269-0.335)       | (0.265-0.330)        |                     | (0.145-0.166)   | (0.151-0.163)     |
|                        | 0.519             | 0.535              | 0.533             | 0.365                | 0.370           | 0.344               | 0.393                 | 0.392             | 0.449                  | 0.425               | 0.402                | 0.398               | 0.435                | 0.519               |                 | 0.131             |
| <i>N. kenki</i>        | (0.503-0.527)     | (0.528-0.539)      | (0.518-0.552)     | (0.346-0.382)        | (0.362-0.376)   | (0.337-0.349)       | (0.382-0.408)         | (0.385-0.396)     | (0.442-0.453)          | (0.415-0.434)       | (0.392-0.411)        | (0.383-0.410)       | (0.420-0.446)        | (0.487-0.550)       |                 | (0.124-0.136)     |
|                        | 0.498             | 0.514              | 0.512             | 0.344                | 0.349           | 0.323               | 0.372                 | 0.370             | 0.427                  | 0.403               | 0.381                | 0.377               | 0.414                | 0.498               | 0.280           |                   |
| <i>N. stygius</i>      | (0.489-0.501)     | (0.514-0.514)      | (0.503-0.526)     | (0.332-0.356)        | (0.347-0.350)   | (0.323-0.323)       | (0.367-0.382)         | (0.370-0.370)     | (0.427-0.427)          | (0.400-0.408)       | (0.378-0.385)        | (0.368-0.384)       | (0.406-0.420)        | (0.473-0.524)       | (0.273-0.284)   |                   |

<sup>1</sup> Species pairs below threshold are presented also in the main text as Fig.3.

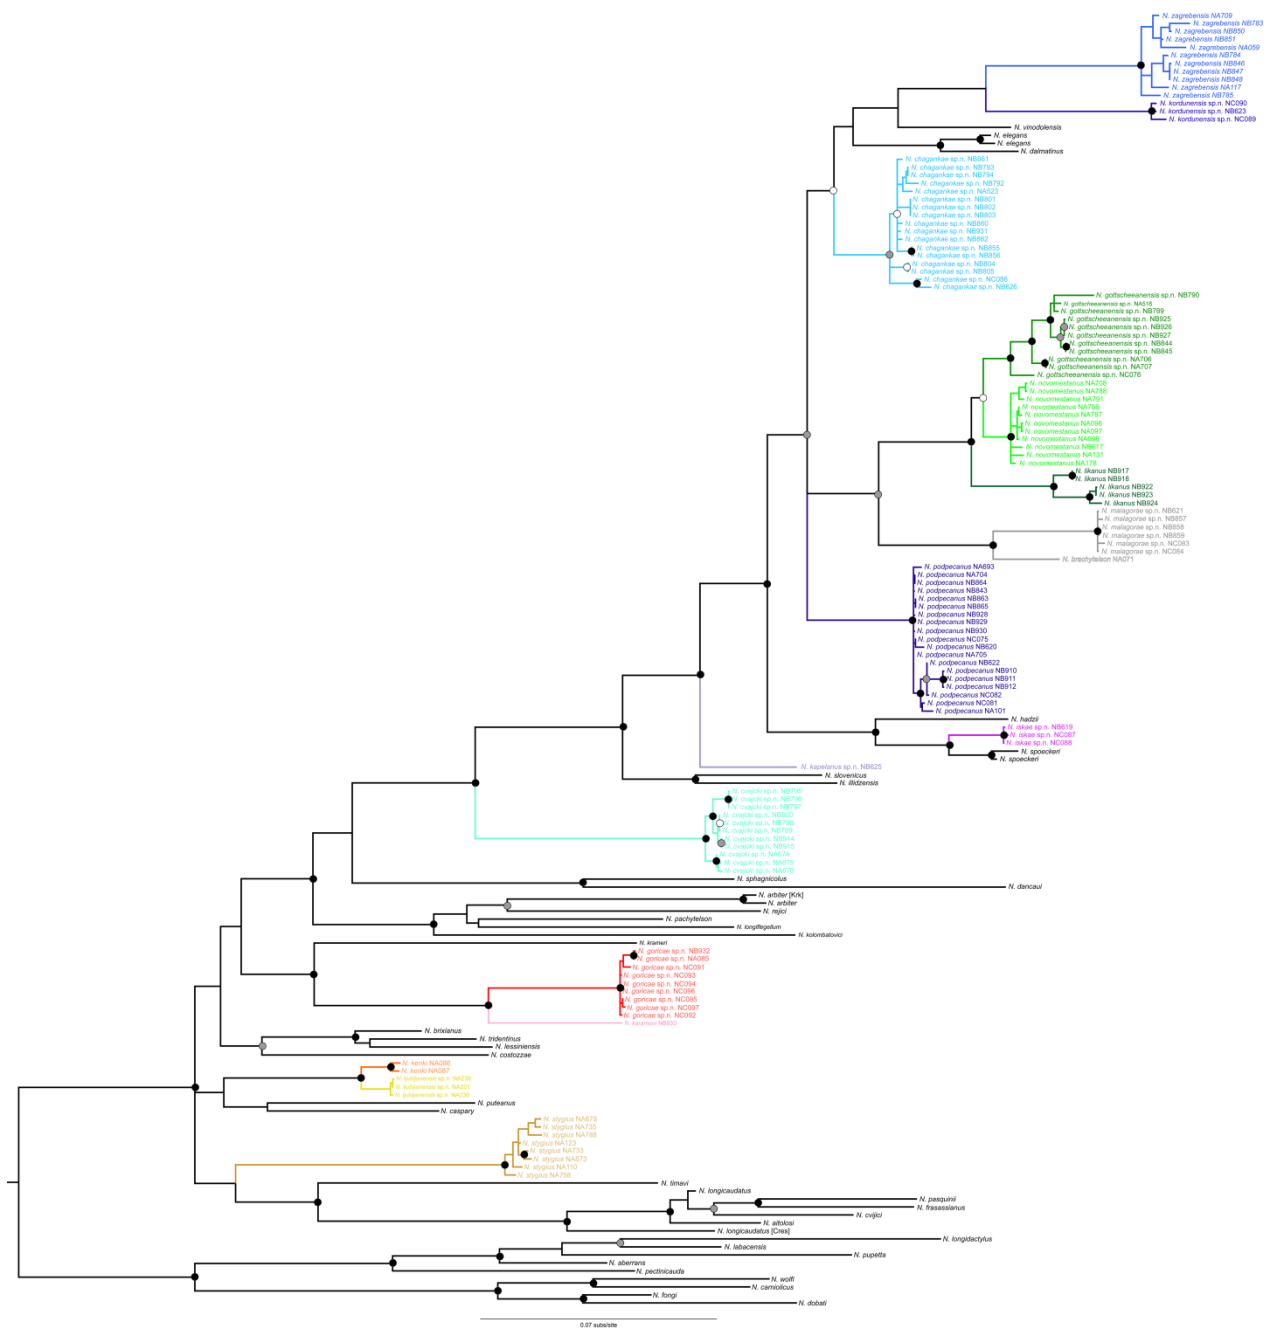

Supplementary Figure S1. Bayesian phylogenetic tree of all analyzed individuals; labels include specimen vouchers.

**Supplementary Material 3.** Morphological diagnosis of the complex, etymology and data about holotypes.

### **Morphological diagnosis of the *N. stygius* complex**

*Niphargus stygius* is the type species of the genus *Niphargus*, described from the caves Postojnska jama and Predjama<sup>7</sup>. Being the first species described, it is one of the species that was repeatedly reported from all parts of the genus range, either as “*N. stygius*” or as some of its forms or subspecies. As the taxonomy of the genus developed, many of these forms or subspecies have been recognized as separate species.

Stanko Karaman was the first who realized that this species needs to be redefined, and in 1952 he published a revision of *N. stygius* from the area of Slovenia and Croatia. Based on his extensive analyses, he suggested that the species could be formally treated as subgenus *Stygoniphargus*, and that this species complex comprises seven subspecies. The species complex is diagnosed as follows.

**Body.** Slender, and may exceed 20 mm in length. Coxal plates as long as deep, or even slightly longer than deep (“flattened”). Epimeral plates (males only) I-II angular, III sometimes pointed. Mesosoma segment III with four thin setae along disto-posterior margins, rarely two or six. Urosoma segment I with a single dorso-postero lateral seta or weak spine, segment II two-three weak spines.

**Antennae.** Shorter than one half of the body length, aesthetascs shorter, one per flagellar article.

**Gnathopods.** Propods with inclined palm, propodus II (in males) as long as broad. Along outer margin of dactylus setae in groups of one to three.

**Pereopods.** Dactyls and their nail slender and narrow, with single spine at the base of nail.

**Pereopods V-VII.** With elongated, ovoid bases, posteriorly straight without distinct disto-posterior lobe.

**Uropods.** Uropod I of old males with endopodite as twice as long as exopodite. Uropod III in old males sometimes with elongated endopodite, distal and proximal article of exopodite rod-shaped, elongated and of equal lengths.

**Telson.** With apical, lateral and sometimes dorsal spines.

**Sexual dimorphism.** Females have more pointed epimeral plates, stronger spines on telson, a broader telson cleft and non-differentiated rami of uropod I.

Already Karaman noted that some of the traits may deviate from the diagnostic combination. A part of deviations were described and named as subspecies (spine pattern of telson, elevated number of mesosomal setae, proportions on uropod III). Despite this, the diagnosis of the species complex is valid and reliable. By contrast, identification of species within the complex is highly unreliable. Our own observations indicate that many of diagnostic traits are variable, sex and age dependent. For detailed identification, readers should consult works of Karaman<sup>8</sup>, Sket<sup>7</sup>, and Karaman<sup>9,10</sup>.

## The cryptic nature of the *N. stygius* complex

Morphological crypsis means that species cannot be told apart on a basis of morphology alone, i.e. when intraspecific variation exceeds interspecific variation. The *N. stygius* species complex is such case. Populations differ from each other and this variation prompted S. Karaman to describe a series of subspecies<sup>8</sup>. Yet, discrimination of Karaman's subspecies is uncertain because intra- and inter-population variation exceeds inter-taxon variation. The taxonomy of this complex is impeded mainly by allometric and indeterminate growth<sup>7</sup>, well studied also in many other niphargids<sup>11</sup>. Many diagnostic traits develop only in the largest males, but due to indeterminate growth it is often impossible to figure out at what stage of the development individual specimens are. Given that body length may evolve in relation to local conditions<sup>12</sup>, it is difficult to estimate whether equally long individuals from different populations represent the same stage in ontogenetic development. We scrutinized series of populations for diagnostic traits of S. Karaman and additional putative diagnostic character, and summarize them in the Table S5. The diagnostic power of traits/characters decreases with the number of analyzed populations.

Table S5. Diagnostic characters proposed to discriminate subspecies diagnosed by S. Karaman. The problem related to diagnostic character is discussed at the bottom of the table.

| Subspecies                | Number of dorsal spines on telson <sup>1</sup> | Gnathopod II – number of setae of groups on carpus* <sup>2</sup> | Gnathopods I-II number of supporting spines on propodus <sup>3</sup> | Uropod I inner ramus in males longer than outer ramus by factor <sup>4</sup> | Uropod III inner ramus elongated in males <sup>5</sup> | Mesosoma segments I-III – number of setae <sup>6</sup> |
|---------------------------|------------------------------------------------|------------------------------------------------------------------|----------------------------------------------------------------------|------------------------------------------------------------------------------|--------------------------------------------------------|--------------------------------------------------------|
| <i>N. s. stygius</i>      | 0                                              | 0                                                                | 1                                                                    | 1.2-1.8                                                                      | short                                                  | 4-5                                                    |
| <i>N. s. brachytelson</i> | 0                                              | 0-1                                                              | 1                                                                    | 1.3-2.5                                                                      | short                                                  | 4                                                      |
| <i>N. s. podpecanus</i>   | 1-2                                            | 1                                                                | 1                                                                    | 1.5-2.0                                                                      | short                                                  | 4                                                      |
| <i>N. s. novomestanus</i> | 1-2 (3)                                        | 1                                                                | 1                                                                    | 1.25-2.0*                                                                    | short                                                  | 4                                                      |
| <i>N. s. likanus</i>      | 1-2                                            | 1                                                                | 1                                                                    | 1.5-2.0                                                                      | short                                                  | 4                                                      |
| <i>N. s. karamani</i>     | 2-6                                            | 1                                                                | 1                                                                    | 1.5-2.5                                                                      | short-long                                             | 4                                                      |
| <i>N. s. kenki</i>        | 2-7                                            | 0                                                                | 1-3                                                                  | 1.5-2.0                                                                      | short                                                  | 4-6                                                    |

<sup>1</sup>Number of spines depends on body size, comparisons between populations are not warranted. Moreover, intervals are broadly overlapping.

<sup>2</sup>This character relates to own observation and may be useful for discrimination of some species<sup>13</sup>, although it depends on body size. However, polymorphism observed in herein studied taxa<sup>14</sup> diminishes the value of this trait in this complex.

<sup>3</sup>This character is rare and frequently occurs in Iranian *Niphargus*. However, we observed a morpho-cline among populations: virtually all individuals in eastern populations have multiple supporting spines whereas only few individuals in the western part of the range have multiplied spines.



<sup>4</sup>This character strongly depends on body size / age of an individual and is problematic *per se*. S Karaman. reported that the inner ramus of *N. s. stygius* and *N. s. novomestanus* is less elongated than in other taxa. However, we found strongly elongated inner rami in populations from both respective taxa in the catchment of Idrijca River and at the village Sela pri Straži.

<sup>5</sup>This character strongly depends on body size / age of an individual and is problematic *per se*. Karaman S. reported that it is strongly elongated in *N. s. karmani*, yet, we found populations with less elongated articles. Even if we did not have fully grown-up individuals at hand, this best illustrates the inoperability of this diagnostic trait.

<sup>6</sup>Setal ornamentation of mesosoma is a rather stable trait within the complex. Yet, there is some polymorphism on the between-population level in two subspecies, noted also in later works of S. Karman<sup>15</sup>.

### Newly described species

*Niphargus goricae* Delić, Trontelj & Fišer sp. n.

ZooBank Isid: A0A0651F-685D-45D4-9477-5E44408D4CF3

WoRMS Isid: 988195

**Type locality:** Water from the well by the house Fram 119, Fram, Maribor, Slovenia

**Type series:** *holotype* is a specimen with voucher number NA085, *paratype* is an intact adult male from the same sample. Samples are deposited in the Zoological collection of the Department of Biology, Biotechnical Faculty, Ljubljana.

**Etymology:** The name is derived from “Slovenske Gorice”, a non-karstic region where the species is distributed.

*Niphargus cvajcki* Delić, Trontelj & Fišer sp. n.

ZooBank Isid: A6B6A0BC-20BC-4109-BAAA-72588484BC5A

WoRMS Isid: 988197

**Type locality:** Cave Šolnovo brezno, Prevole, Žužemberk, Slovenia

**Type series:** *holotype* is a specimen with voucher number NB915, *paratype* is a specimen with voucher number NB914. Samples are deposited in the Zoological collection of the Department of Biology, Biotechnical Faculty, Ljubljana.

**Etymology:** The name is derived from Slovenian autochthonous wine “Cviček”, in local dialect called “cvajčk”. The species is distributed in the area where this wine is produced.

*Niphargus kapelanus* Delić, Trontelj & Fišer sp. n.

ZooBank Isid: 10A49E2A-C93C-4114-A6EF-54374FE89AE1

WoRMS Isid: 988196

**Type locality:** Cave Špilja pod Mačkovom dragom, Bjelolasica, Ogulin, Croatia

**Type series:** *holotype* is a specimen with voucher number NB625. The sample is deposited in the Zoological collection of the Department of Biology, Biotechnical Faculty, Ljubljana.

**Etymology:** The name is derived from “Kapela”, a mountain on the border between the regions Lika and Gorski Kotar, at the bottom of which is type locality.

*Niphargus iskae* Delić, Trontelj & Fišer sp. n.

ZooBank Isid: 840AD88E-59E9-4969-ABBE-C4EFEB8D02D9

WoRMS Isid: 988194

**Type locality:** Spring on the foothill of Mačji rep, Škrabče, Nova vas, Slovenia

**Type series:** *holotype* is a specimen with voucher number NC087, *paratype* is an intact male from the same sample. Samples are deposited in the Zoological collection of the Department of Biology, Biotechnical Faculty, Ljubljana.

**Etymology:** The name is derived from river Iška, which cuts a canyon at northern boundary of Dinaric Karst in central Slovenia.

**Remarks:** The species was used in a study of photophobic response by Fišer et al. (2016), where it is referred to as *N. cf. podpecanus*.

*Niphargus gottscheanensis* Delić, Trontelj & Fišer sp. n.

ZooBank Isid: 1EEEE2DC-8016-40CE-AB83-3E142905EAB2

WoRMS Isid: 988192

**Type locality:** Cave Željnske jame, Željne, Kočevje, Slovenia

**Type series:** *holotype* is a specimen with voucher number NB488, *paratype* is an intact male from the same sample. Sample are deposited in the Zoological collection of the Department of Biology, Biotechnical Faculty, Ljubljana.

**Etymology:** The name is derived from the old German name of Kočevje town. The town was first mentioned in late 14 century under the name *Gottschee*, and by that time controlled by counts of Ortenburg.

*Niphargus malagorae* Delić, Trontelj & Fišer sp. n.

ZooBank Isid: 333C1C2D-DF19-4B13-826D-C57782EF2864

WoRMS Isid: 988193

**Type locality:** Cave Mivčja jama, Gornje Lepovčje, Ribnica, Slovenia

**Type series:** *holotype* is a specimen with voucher number NB858, *paratype* is an intact male from the same sample. Samples are deposited in the Zoological collection of the Department of Biology, Biotechnical Faculty, Ljubljana.

**Etymology:** The name is derived from the geographic name of Mala Gora, a Dinaric massif where the type locality lies.

*Niphargus chagankae* Delić, Trontelj & Fišer sp. n.

ZooBank Isid: 4DF5BD7A-B343-4354-AC65-F7FFFA829123

WoRMS Isid: 988191

**Type locality:** Cave Čaganka, Poljanska gora, Črnomelj, Slovenia

**Type series:** *holotype* is a specimen with voucher number NB792, *paratype* is an intact male from the same sample. Samples are deposited in the Zoological collection of the Department of Biology, Biotechnical Faculty, Ljubljana.

**Etymology:** The name is derived from the name of the type locality, cave Čaganka.

*Niphargus kordunensis* Delić, Trontelj & Fišer sp. n.

ZooBank Isid: 2A2EBA04-D1C8-4024-A1B0-D9BBE0E93CFD

WoRMS Isid: 988190

**Type locality:** Matešička špilja, Matešići, Slunj, Croatia

**Type series:** *holotype* is a specimen with voucher number NB623, *paratype* is a specimen with voucher number NC089. Samples are deposited in the Zoological collection of the Department of Biology, Biotechnical Faculty, Ljubljana.

**Etymology:** The name is derived from the geographical name Kordun, a region in central Croatia, where the type locality is situated.

## References

1. Lanfear, R., Calcott, B., Ho, S. Y. W. & Guindon, S. PartitionFinder: Combined selection of partitioning schemes and substitution models for phylogenetic analyses. *Mol. Biol. Evol.* **29**, 1695–1701 (2012).
2. Verovnik, R., Sket, B. & Trontelj, P. The colonization of Europe by the freshwater crustacean *Asellus aquaticus* (Crustacea: Isopoda) proceeded from ancient refugia and was directed by habitat connectivity. *Mol. Ecol.* **14**, 4355–4369 (2005).
3. Colgan, D. *et al.* Histone H3 and U2 snRNA DNA sequences and arthropod molecular evolution. *Aust. J. Zool.* **46**, 419–437 (1998).
4. Folmer, O., Black, M., Hoeh, W., Lutz, R. & Vrijenhoek, R. DNA primers for amplification of mitochondrial cytochrome c oxidase subunit I from diverse metazoan invertebrates. *Mol. Mar. Biol. Biotechnol.* **3**, 294–299 (1994).
5. Fišer, Ž., Altermatt, F., Zakšek, V., Knapič, T. & Fišer, C. Morphologically cryptic Amphipod species are 'ecological clones' at regional but not at local scale: a case study of four *Niphargus* species. *PLoS One* **10**, e0134384 (2015).
6. Flot, J.-F., Wörheide, G. & Dattagupta, S. Unsuspected diversity of *Niphargus* amphipods in the chemoautotrophic cave ecosystem of Frasassi, central Italy. *BMC Evol. Biol.* **10**, 1–18 (2010).
7. Sket, B. *Niphargus stygius* (Schiödte) (Amphipoda, Gammaridae)- die Neubeschreibung des Generotypus, Variabilität, Verbreitung und Biologie der Art, I. *Biološki Vestn.* **22**, 91–103 (1974).
8. Karaman, S. Podrod *Stygoniphargus* u Sloveniji i Hrvatskoj. *Prirodosl. istraživanja* **25**, 5–38 (1952).
9. Karaman, G. S. Two poorly known species of the subterranean family Niphargidae (Gammaridea) from Slovenia and Croatia (Contribution to the Knowledge of the Amphipoda 276). *Nat. Montenegrina* **13**, 281–308 (2014).
10. Karaman, G. S. *Niphargus cerjanensis*, sp. n. and *N. karamani* Schell. 1935 from the subterranean waters of Western Balkan (Contribution to the knowledge of the Amphipoda 277). *Agric. For.* **60**, 223–256 (2014).
11. Fišer, C., Bininda-Emonds, O. R. P., Blejec, A. & Sket, B. Can heterochrony help explain the high morphological diversity within the genus *Niphargus* (Crustacea: Amphipoda)? *Org. Divers. Evol.* **8**, 146–162 (2008).
12. Delić, T., Trontelj, P., Zakšek, V. & Fišer, C. Biotic and abiotic determinants of appendage length evolution in a cave amphipod. *J. Zool.* **299**, 42–50 (2016).
13. Fišer, C., Sket, B. & Stoch, F. Distribution of four narrowly endemic *Niphargus* species (Crustacea: Amphipoda) in the western Dinaric region with description of a new species. *Zool. Anz.* **245**, 77–94 (2006).
14. Fišer, C. & Zgajmajster, M. Cryptic species from cryptic space: the case of *Niphargus fongi* sp. n. (Amphipoda, Niphargidae). *Crustaceana* **82**, 593–614 (2009).
15. Karaman, S. L. Die *Niphargiden* des slovenischen Karstes, Istriens sowie des benachb. Italiens. *Acta Musei Maced. Sci. Nat.* **3**, (1954).
